# Supplementary material for: Transcriptional Plasticity Drives Leukemia Immune Escape
Source: PubMed Central journal article supplement — Blood Cancer Discov. 2022 Jun 15;3(5):394–409. doi: 10.1158/2643-3230.BCD-21-0207 (PMC9897290; doi:10.1158/2643-3230.bcd-21-0207), 2022-06-15
Supplement: bcd-21-0207_supplementary_table_1_suppst1.pdf [file bcd-21-0207_supplementary_table_1_suppst1.pdf]

**Supplementary Table 1.** Sequences of guide RNAs used for gene knockouts.

|                             |                                                                     |
|-----------------------------|---------------------------------------------------------------------|
| AAVS1 “safe harbor” control | CUCCCUCCCAGGAUCCUCUC                                                |
| MYB knockout gRNAs ##1-3    | CAGCAUAUAUAGCAGUGACG<br>GAUGGGCUGCUUCCCAAGUC<br>AUGAUUAGUUACCUCUCC  |
| IRF8 knockout gRNAs ##1-2   | AGUGACGGACCGGUCCCAAC<br>CGGAUCCCUUGGAAACACGC                        |
| MEF2C knockout gRNAs ##1-2  | GACAAACUCAGACAUCGUGG<br>GAGUUUGUCCGGCUCUCAUG                        |
| MEIS1 knockout gRNAs ##1-3  | GUGCUAAGAGAGGGAAGAGG<br>CGCGAGCCGGGGUGGCGGG<br>UAUAGCCGUGUUCGCCAAAC |
| CIITA knockout gRNAs ##1-3  | CACAGCUGAGCCCCCACUG<br>GGCUCCUGGUUGAACAGCGC<br>CCCCUAACAUACUGGGAAUC |
