# Supplementary figures and images for: Transcriptional Plasticity Drives Leukemia Immune Escape
Source: PubMed Central journal article supplement — Blood Cancer Discov. 2022 Jun 15;3(5):394–409. doi: 10.1158/2643-3230.BCD-21-0207 (PMC9897290; doi:10.1158/2643-3230.bcd-21-0207), 2022-06-15

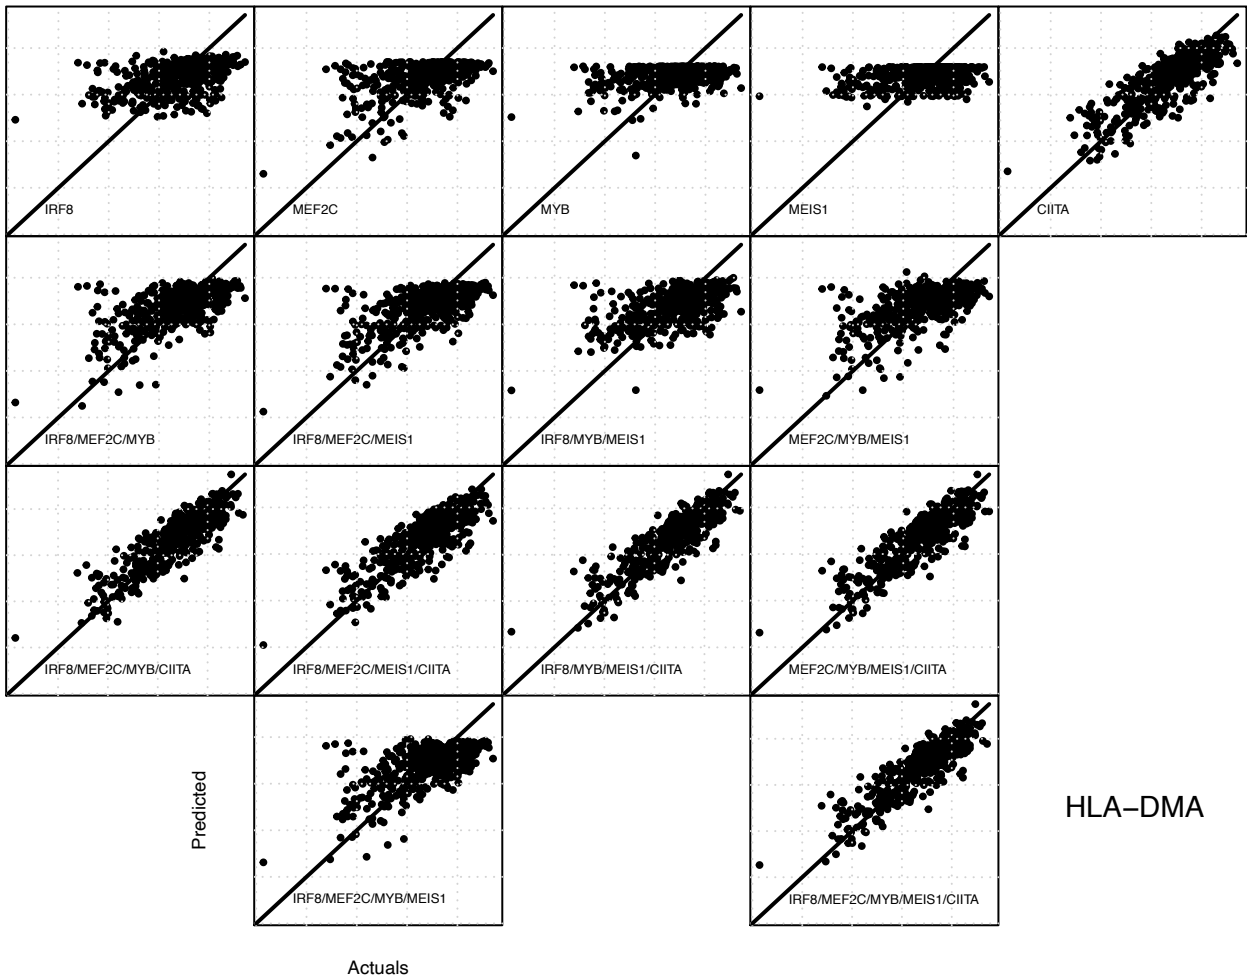

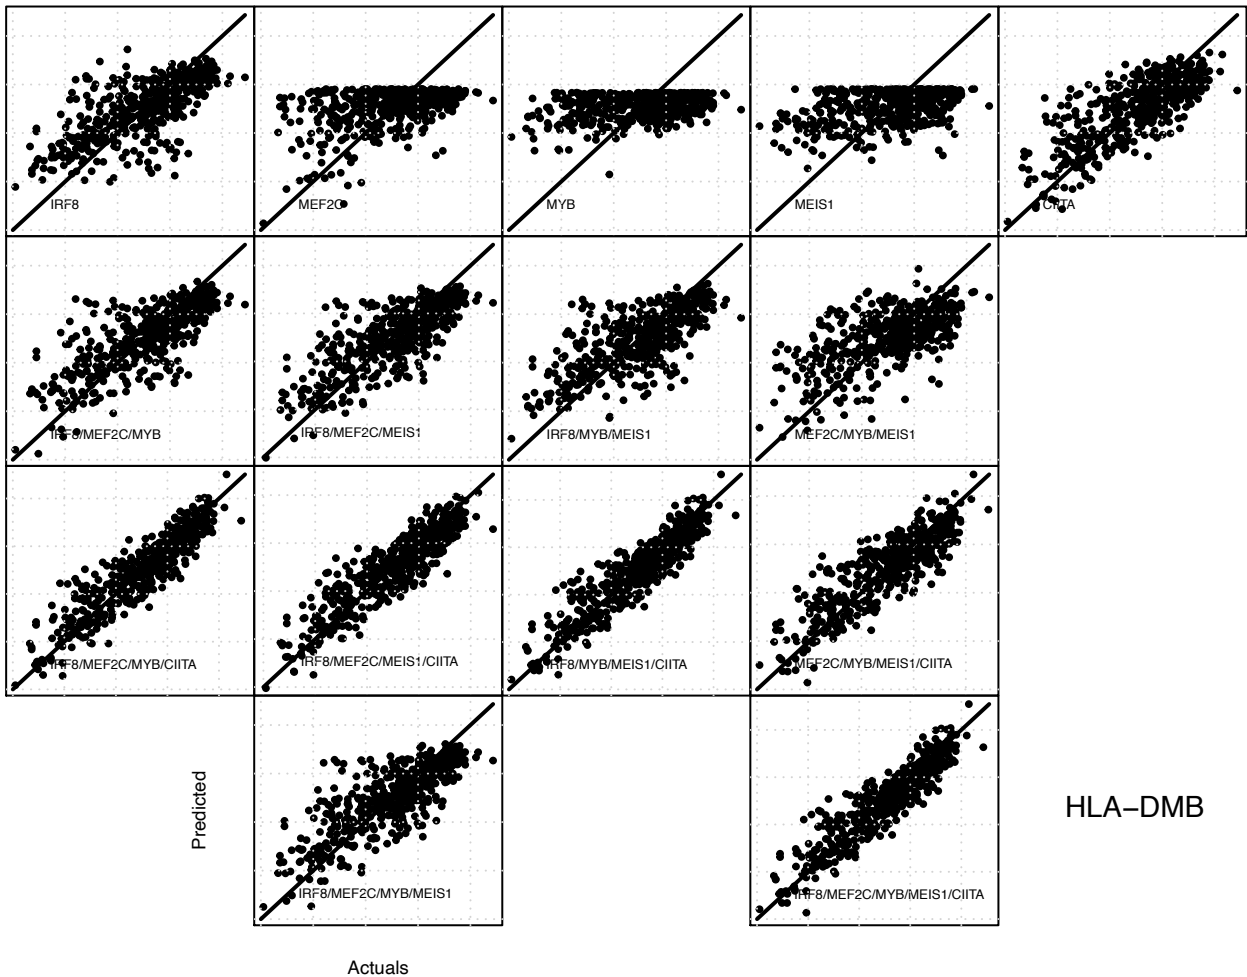

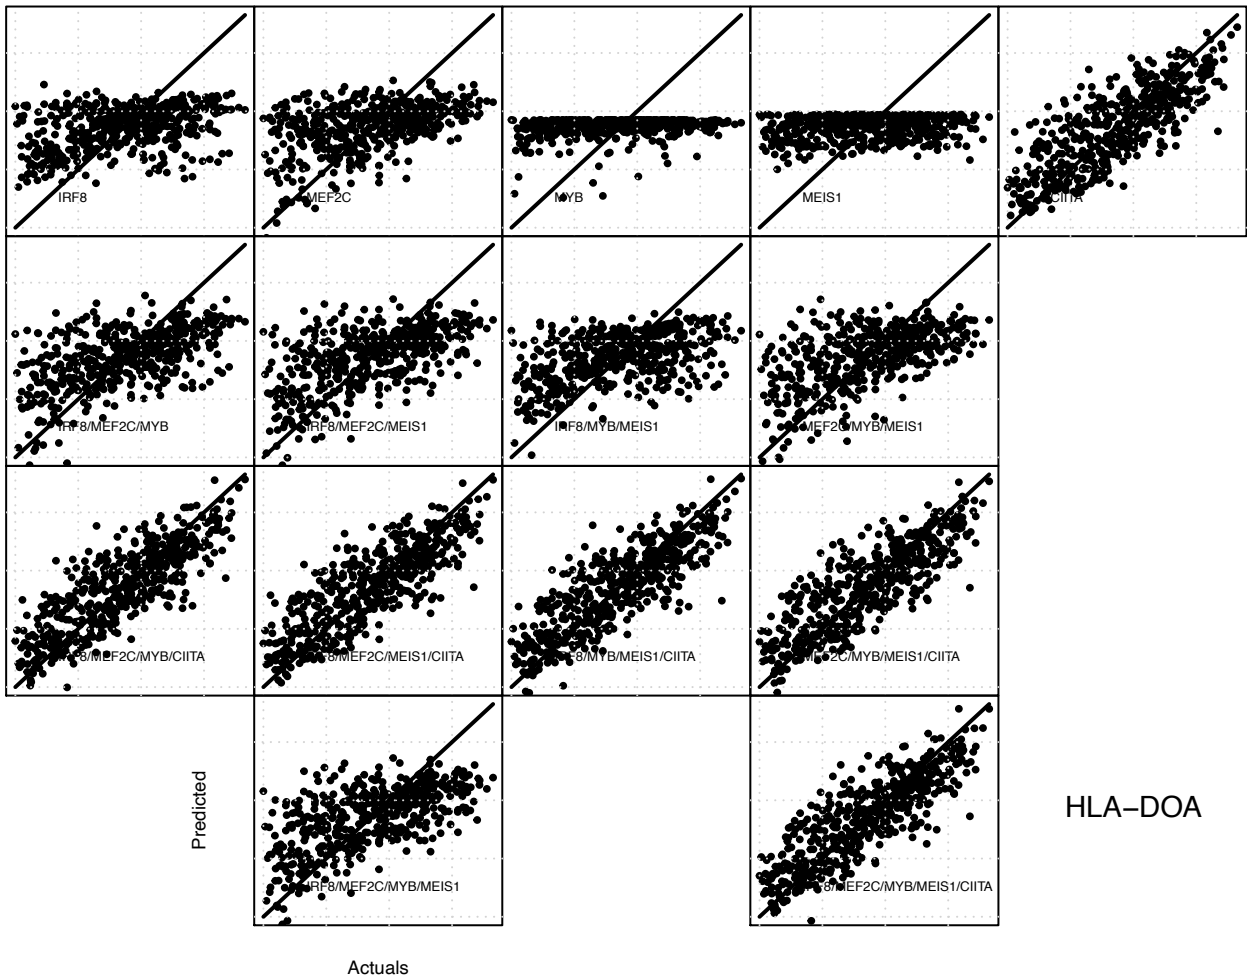

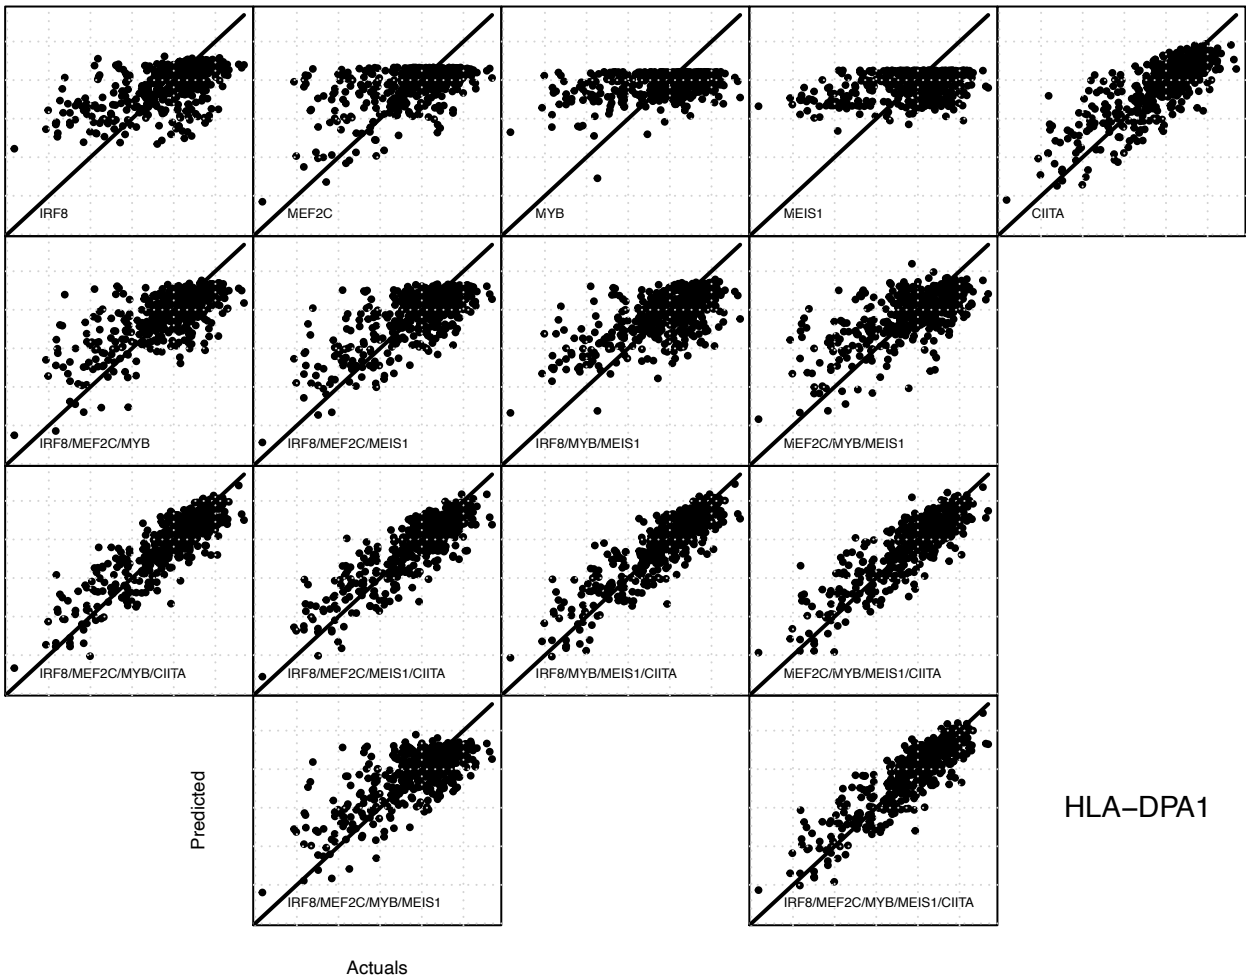

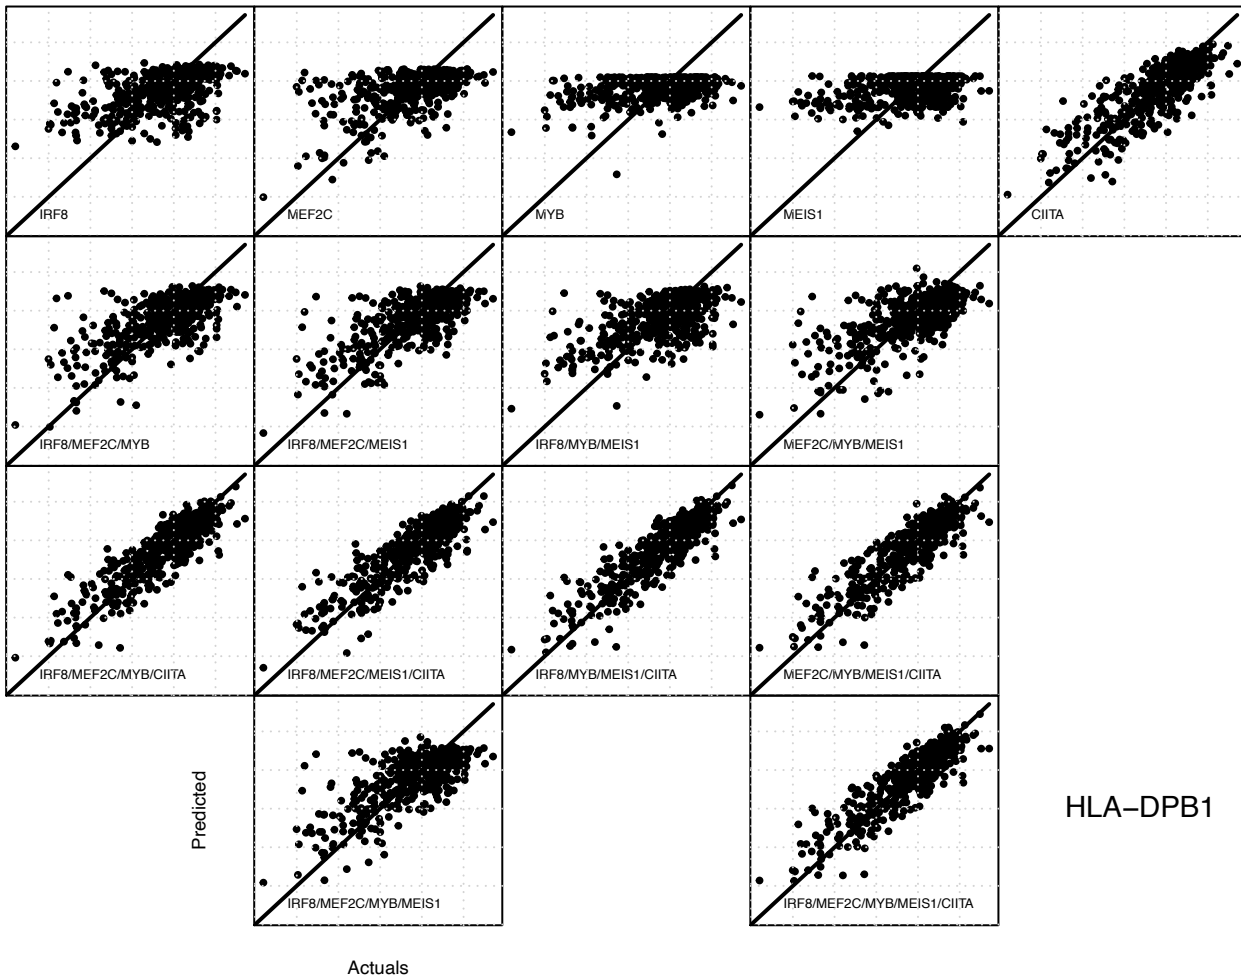

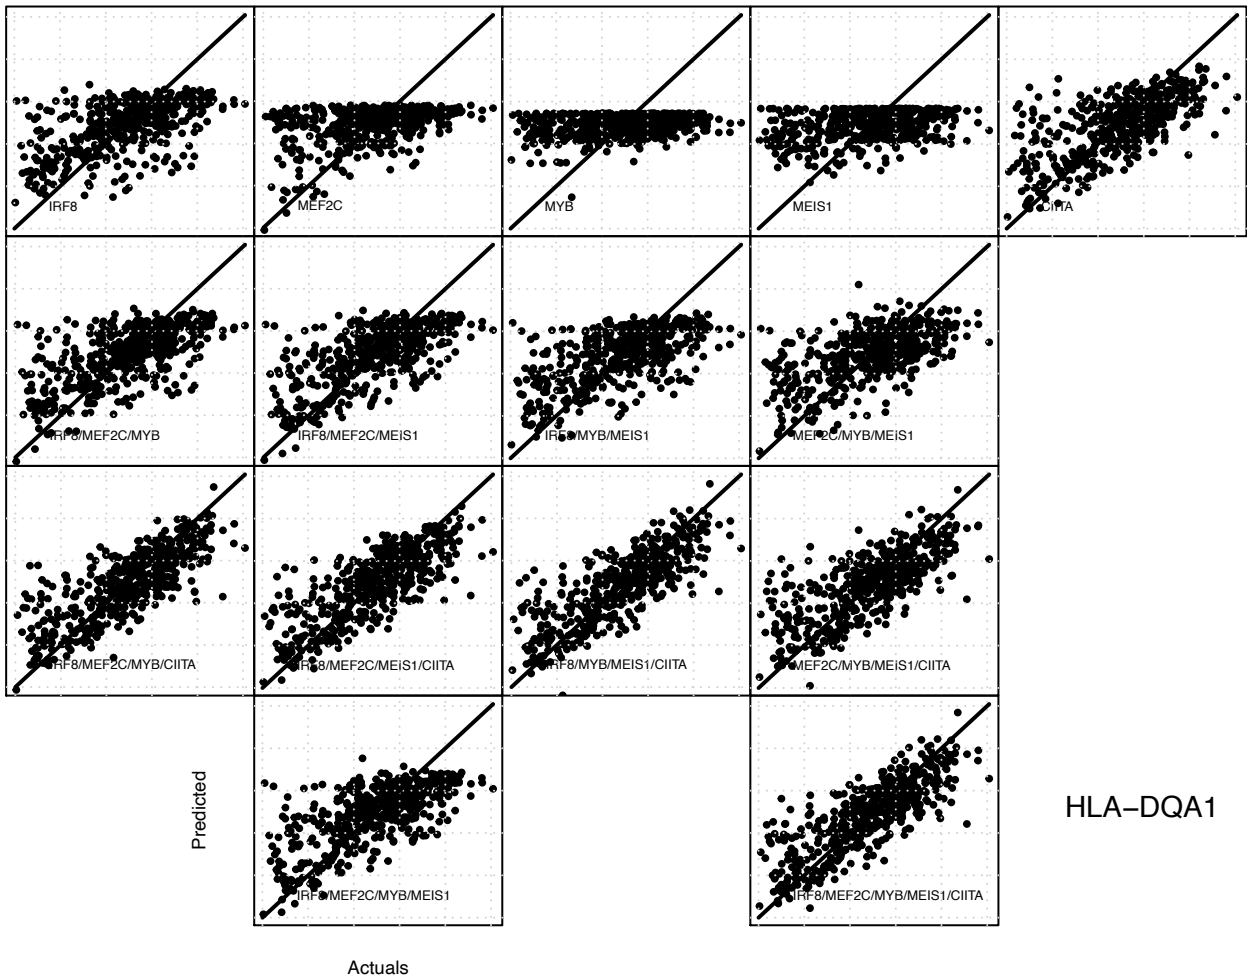

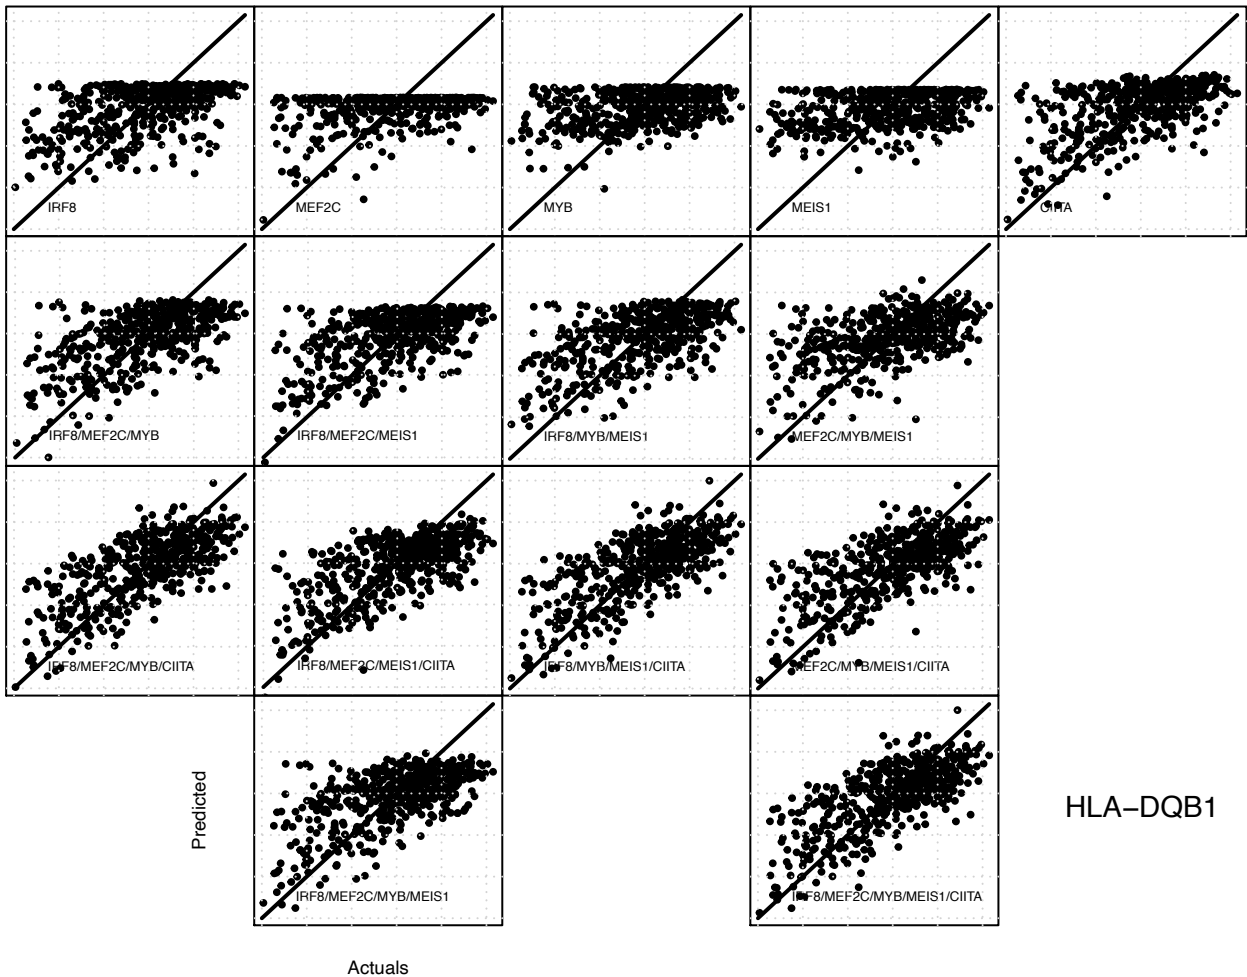

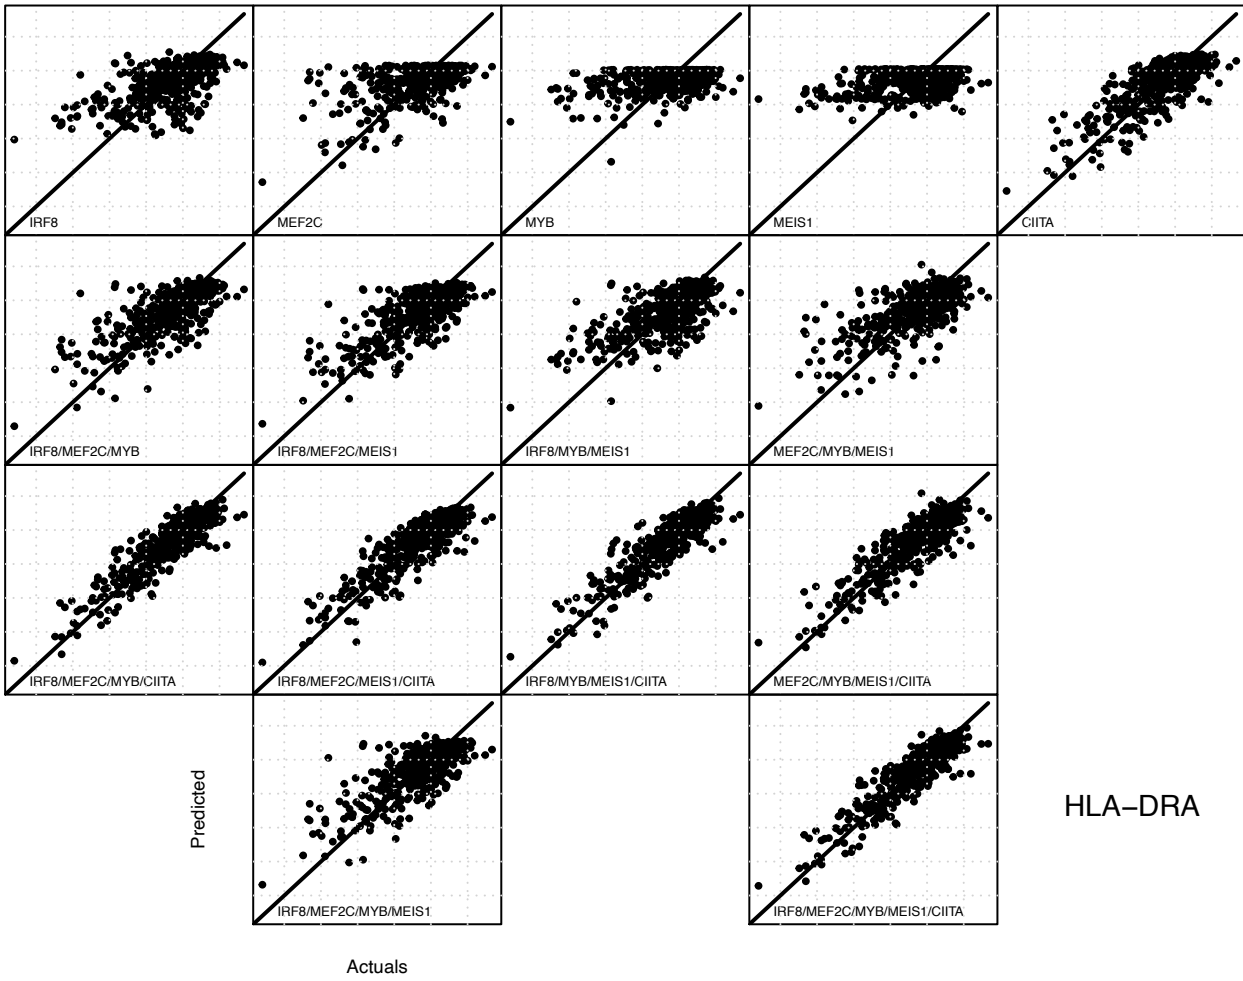



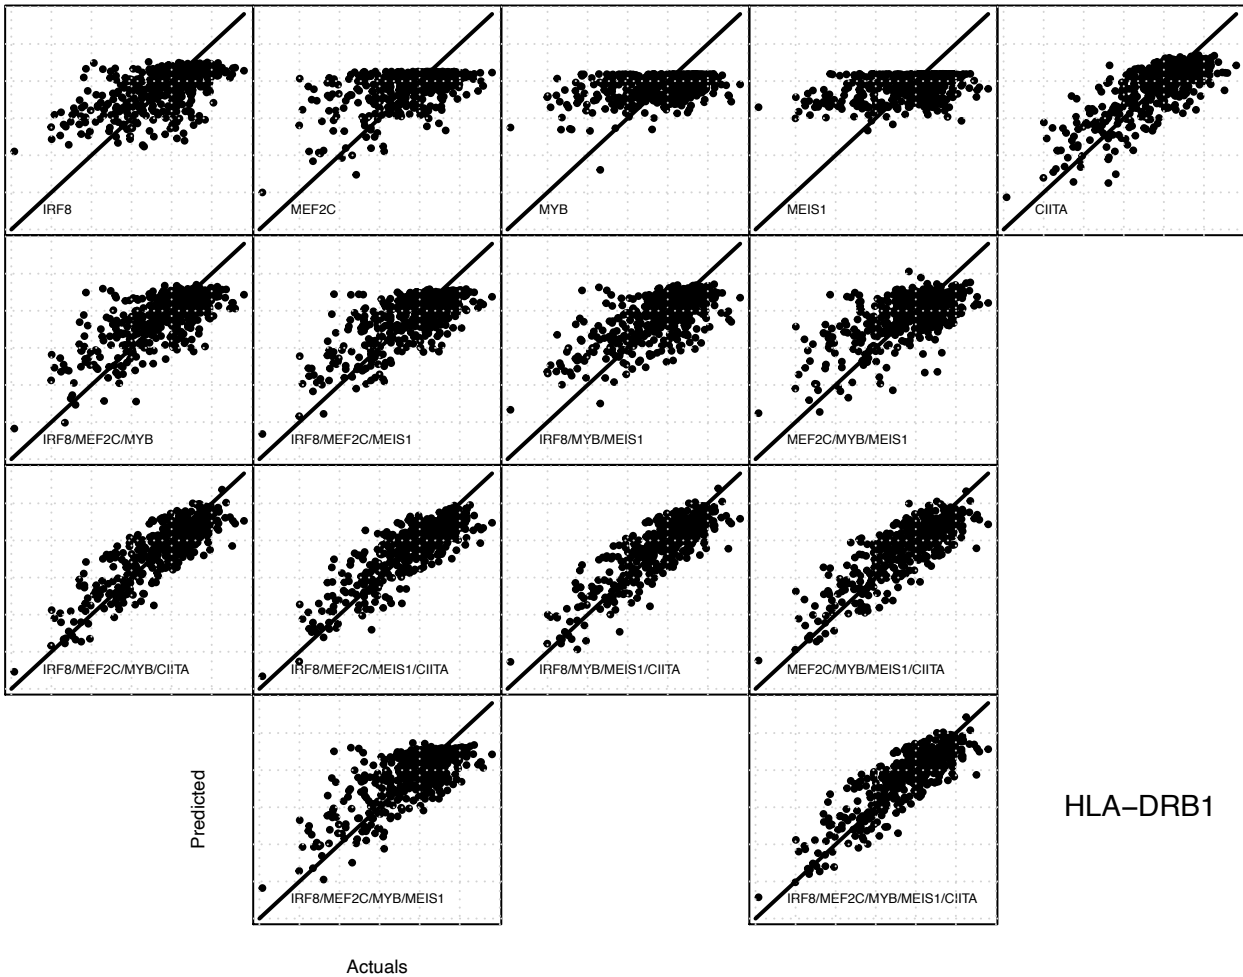

HLA-DRB1

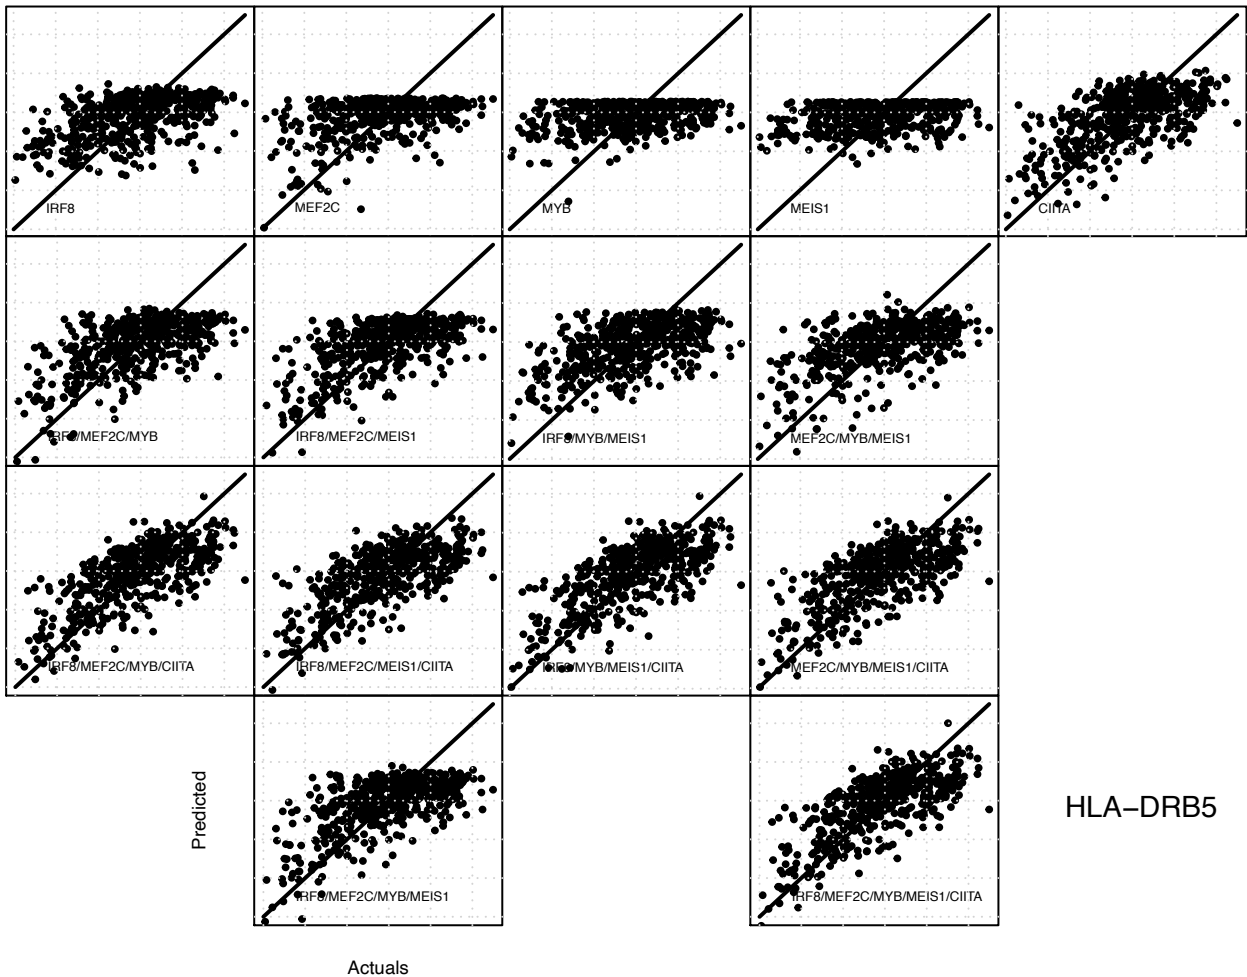

Supplement: bcd-21-0207_supplementary_data_6_suppsm6.pdf [file bcd-21-0207_supplementary_data_6_suppsm6.pdf]
